# Supplementary material
Source: PubMed Central journal article supplement (PMC4827781)
Supplement: NIHMS770474-supplement-01.pdf [file NIHMS770474-supplement-01.pdf]

## **ONLINE SUPPLEMENT**

### **Parallel Analyses of the CPS**

This supplement describes a parallel analysis of data from the 1983 to 2002 Social and Economic Supplements of the CPS (King et al. 2010). The CPS is based on annual representative samples of the non-institutionalized adult population in the U.S. It includes data on basic employment and demographic characteristics as well as detailed information on personal income. This analysis, by corroborating key findings from the main text, is intended to attenuate possible concerns about measurement limitations in the GSS. Although the GSS contains more precise measures of workplace ownership and authority relations, it uses a less accurate interval measure of personal income and is based on smaller samples than the CPS. If key substantive findings can be replicated with alternative samples and measures, this bolsters confidence in their validity. This analysis focuses on the 980,841 respondents from the 1983 to 2002 CPS waves who were 18 to 65 years old and worked full-time during the previous calendar year. This is the period and sample for which a consistent proxy measure of social class can be constructed in the CPS.

Unlike the GSS, the CPS uses an extensive battery of questions to measure income in nominal dollars from employment, businesses, farm operations, and different types of investments. These amounts are then summed to arrive at a measure of personal market income. In the public-use CPS files, very high incomes are topcoded to protect respondent anonymity. These topcoded values are replaced with group means of the uncensored income values above the topcoding threshold, which were computed from restricted-use CPS files and publically reported with special permission by Larrimore et al. (2008). Nominal incomes are adjusted for price inflation using the Consumer Price Index, with all values expressed in 2011 dollars, and a

small number of respondents who report implausibly low annual incomes are truncated (<5000 real dollars). All analyses are based on the natural log transformation of income.

Similar to the GSS, the CPS records a respondent's self-employment status, but it does not directly inquire about a respondent's authority at work. Instead, it asks about a respondent's occupation, which indirectly provides at least some information about supervisory and managerial powers because these social relations are partially expressed through the technical division of labor. Thus, together with information on self-employment, occupational data can be used to construct a proxy measure of social class. Specifically, CPS respondents are classified as proprietors if they are self-employed in an occupation that typically involves supervisory or managerial responsibilities; as independent producers if they are self-employed in an occupation that does not typically involve supervisory or managerial responsibilities; as managers if they work for someone else in an occupation that typically involves supervisory or managerial responsibilities; and as workers if they are employed by someone else in an occupation that does not typically involve supervisory or managerial responsibilities.

To determine which occupations "typically involve supervisory or managerial responsibilities," detailed occupational categories were first collapsed into more aggregate groups to yield sufficiently large sample sizes. Then, these occupational groups were cross-tabulated with respondent reports of supervisory authority from the GSS. This cross-tabulation is presented in the left-hand columns of Table A.1, with occupational groups sorted in descending order based on the percentage of respondents who reported that they supervise others at work. The right-hand column of Table A.1 provides a list of the detailed SOC codes used to construct each aggregate occupational group. Occupational groups in which more than 50 percent of respondents reported that they supervise others at work are defined to "typically involve

supervisory or managerial responsibilities,” and thus respondents in these occupations are classified as either proprietors or managers, depending on their self-employment status. Occupational groups in which less than 50 percent of respondents reported supervising others at work are defined to not typically involve supervisory or managerial responsibilities, and thus respondents in these occupations are classified as either independent producers or workers, depending on their self-employment status.

This occupation-based proxy measure of social class is subject to known error. It misclassifies (1) respondents who have control over the work activities of others but are in occupations that do not typically involve supervisory or managerial responsibilities and (2) respondents who do not have any control over the work activities of others but are in occupations that do typically involve supervisory or managerial responsibilities. Table A.2 presents misclassification rates computed from the GSS, which give the percentage of respondents classified differently under the direct versus occupation-based proxy measure of social class. These rates indicate that the occupation-based proxy measure misclassifies about 30 percent of respondents overall. Furthermore, the class-specific rates indicate that independent producers are especially prone to measurement error, as more than 40 percent of this group as defined by the occupation-based proxy measure consists of misclassified proprietors. This pattern of measurement error together with evidence of increasing social class inequality within occupational categories from the GSS suggests that results from the CPS will significantly understate the level of growth in social class inequality. But despite these known limitations, occupational categories still capture at least some information about workplace authority, and thus results from the CPS based on this occupational proxy measure should roughly track those from the GSS.

Figure A.1 displays trends in mean log income computed from the CPS. The upper panel of the figure displays unadjusted estimates separately for each social class position, and the lower panel displays covariate-adjusted estimates computed from a multivariate model with controls for age, race, gender, education, and geographic region. Specifically, the upper panel of Figure A.1 shows that incomes for proprietors and managers increased by about 18 and 14 percent, respectively, between 1983 and 2002, while incomes for workers increased by just 6 percent over the same time period. These trends are fairly consistent with those estimated from the GSS. In stark contrast to results from the GSS, Figure A.1 indicates that incomes for independent producers increased by about 20 percent, on average, between 1983 and 2002. This anomaly is almost certainly due to the large number of proprietors misclassified as independent producers under the occupational proxy measure of social class. The lower panel of Figure A.1 indicates that divergent income trends between social classes are not simply due to potentially confounding demographic or human capital characteristics.

Figure A.2 displays CPS estimates of total income inequality between social classes as indicated by the mean squared deviation of the estimated class means from the estimated population mean. This metric is scaled to equal one in 1983, and all values thereafter represent proportionate changes. Point estimates indicate that unadjusted income differences between social class positions increased by about 36 percent and that covariate-adjusted income differences more than doubled between 1983 and 2002. Note that these trends are significantly attenuated by what is almost certainly an erroneous pattern of strong income growth observed among independent producers. As a comparative reference, Figure A.2 also displays estimates quantifying growth in income differences between education levels, which indicate that they increased by more than twofold. These results are generally consistent with those from the GSS,

although they indicate a less pronounced level of growth in social class inequality over time.

This is expected given the known limitations of the occupational proxy measure of social class.

Figure A.3 displays the trend in total variance of log income computed from the CPS, and Table A.3 decomposes this trend into compositional, between-class, and within-class effects. Between 1983 and 2002, the total variance increased by about 30 percent, from 0.36 to 0.47, in the CPS. Results from the decomposition analysis indicate that compositional changes in the relative sizes of social classes had a negligible dampening effect and that changes in between-class income differences had a modest inflationary effect on the trend in total income inequality. For example, estimates indicate that growth in between-class income differences explains 11 percent of the increase in personal income inequality between 1983 and 2002, and 15 percent of the increase between 1990 and 2002. These results are consistent with those from the GSS.

Figure A.4 displays counterfactual variance estimates that quantify the net effects of changes in income differences between social classes and education levels on trends in personal income inequality in the CPS. In contrast to the observed variance, which increased by about 30 percent from 1983 to 2002, the counterfactual estimates quantifying the between-class effect indicate that the variance of log income would have increased by only 25 percent, from 0.36 to 0.45, if income differences between social class positions had remained unchanged at their 1983 level. The counterfactual estimates quantifying the between-education effect indicate that the variance of log income would have increased by about 20 percent, from 0.36 to 0.43, if income differences between education levels had remained unchanged at their 1983 level. This suggests that increasing income returns to education had a somewhat larger effect on trends in personal income inequality than increasing income differences between social classes, although the between-class effect is muted in the CPS due to known patterns of measurement error.

In sum, results from the CPS, which are based on a more precise measure of personal income but a less precise proxy measure of social class, are generally consistent with results from the GSS. Analyses of both datasets suggest a significant increase in social class inequality driven by growing incomes for proprietors and managers, and stagnating incomes for workers. Both datasets also suggest that these changes had a significant inflationary effect on population-level trends in personal income inequality. It is unlikely that these general patterns are due to unknown measurement limitations.

Table A.1. Summary of the Occupational Proxy Measure of Social Class

| Occupational group              | Pct w/ Auth. | Proxy Coding  |          | 1980/1990 SOCs                    |
|---------------------------------|--------------|---------------|----------|-----------------------------------|
|                                 |              | Self-employed | Employed |                                   |
| Production/trade supervisors    | 86.05        | Proprietor    | Manager  | 503,553-8,613,633,803,823,843     |
| Office/clerical supervisors     | 82.90        | Proprietor    | Manager  | 303-7,413-5,433,448,456           |
| FIRE/sales professionals        | 76.38        | Proprietor    | Manager  | 243-55                            |
| Jurists                         | 72.92        | Proprietor    | Manager  | 178-9                             |
| Execs, managers, administrators | 72.84        | Proprietor    | Manager  | 3-22,23-37                        |
| Clergy                          | 70.97        | Proprietor    | Manager  | 176                               |
| Farm/agricultural managers      | 69.23        | Proprietor    | Manager  | 475-7,485                         |
| Health professionals            | 67.56        | Proprietor    | Manager  | 84-9,96                           |
| Construction/extraction trades  | 49.55        | Ind. Producer | Worker   | 563-99,615-7                      |
| Architects, engineers           | 43.00        | Ind. Producer | Worker   | 43-59                             |
| Farmers, agricultural workers   | 40.86        | Ind. Producer | Worker   | 473-4,479-84,486-98               |
| Writers, artists, entertainers  | 37.94        | Ind. Producer | Worker   | 183-99                            |
| Social/recreational workers     | 33.33        | Ind. Producer | Worker   | 174-5,177                         |
| Mechanics                       | 32.71        | Ind. Producer | Worker   | 505-49                            |
| Scientists                      | 32.26        | Ind. Producer | Worker   | 63-83,166-73                      |
| Precision production workers    | 30.03        | Ind. Producer | Worker   | 634-99                            |
| Sales workers                   | 29.95        | Ind. Producer | Worker   | 256-85                            |
| Technicians and programmers     | 28.36        | Ind. Producer | Worker   | 213-35                            |
| Vehicle/machine operators       | 26.38        | Ind. Producer | Worker   | 703-79,804-13,824-9,844-59        |
| Clerical workers                | 26.12        | Ind. Producer | Worker   | 308-89                            |
| Teachers                        | 25.70        | Ind. Producer | Worker   | 113-65                            |
| Other laborers                  | 24.59        | Ind. Producer | Worker   | 863-89                            |
| Fabricators, inspectors         | 23.36        | Ind. Producer | Worker   | 783-99                            |
| Service workers                 | 20.07        | Ind. Producer | Worker   | 403-7,416-31,434-47,449-55,457-69 |
| Nurses, health techs            | 11.93        | Ind. Producer | Worker   | 95,97-106,203-8                   |

Notes: The percentages of respondents with supervisory authority come from GSS respondents who are 18 to 65 years old and work full-time in the 1988 to 2010 waves.

Table A.2. Misclassification Rates for Occupational Proxy Measure of Social Class

| Class Position | Misclassification Rate |
|----------------|------------------------|
| Workers        | 0.27                   |
| Ind. producers | 0.42                   |
| Managers       | 0.32                   |
| Proprietors    | 0.34                   |
| Total          | 0.30                   |

Notes: Sample includes respondents who are 18 to 65 years old and work full-time in the 1988 to 2010 GSS waves. Misclassification rates give the percentage of respondents classified differently under the direct versus occupational proxy measure.



Table A.3. Decomposition of Trends in Personal Income Inequality by Social Class Position

| Period       | Compositional | Between-class | Within-class |
|--------------|---------------|---------------|--------------|
|              | effect        | effect        | effect       |
|              | Point est.    | Point est.    | Point est.   |
| 1983 to 1990 | -0.03         | 0.05          | 0.98         |
| 1983 to 1995 | -0.02         | 0.06          | 0.95         |
| 1983 to 2002 | -0.01         | 0.11          | 0.90         |
| 1990 to 1995 | -0.02         | 0.08          | 0.93         |
| 1990 to 2002 | -0.02         | 0.15          | 0.87         |

Notes: Sample includes respondents who are 18 to 65 years old and work full-time in the 1983 to 2002 CPS waves. Results are based on 10 multiple imputation datasets.

Figure A.1. Income Trends by Social Class Position (Occupational Proxy Measure)

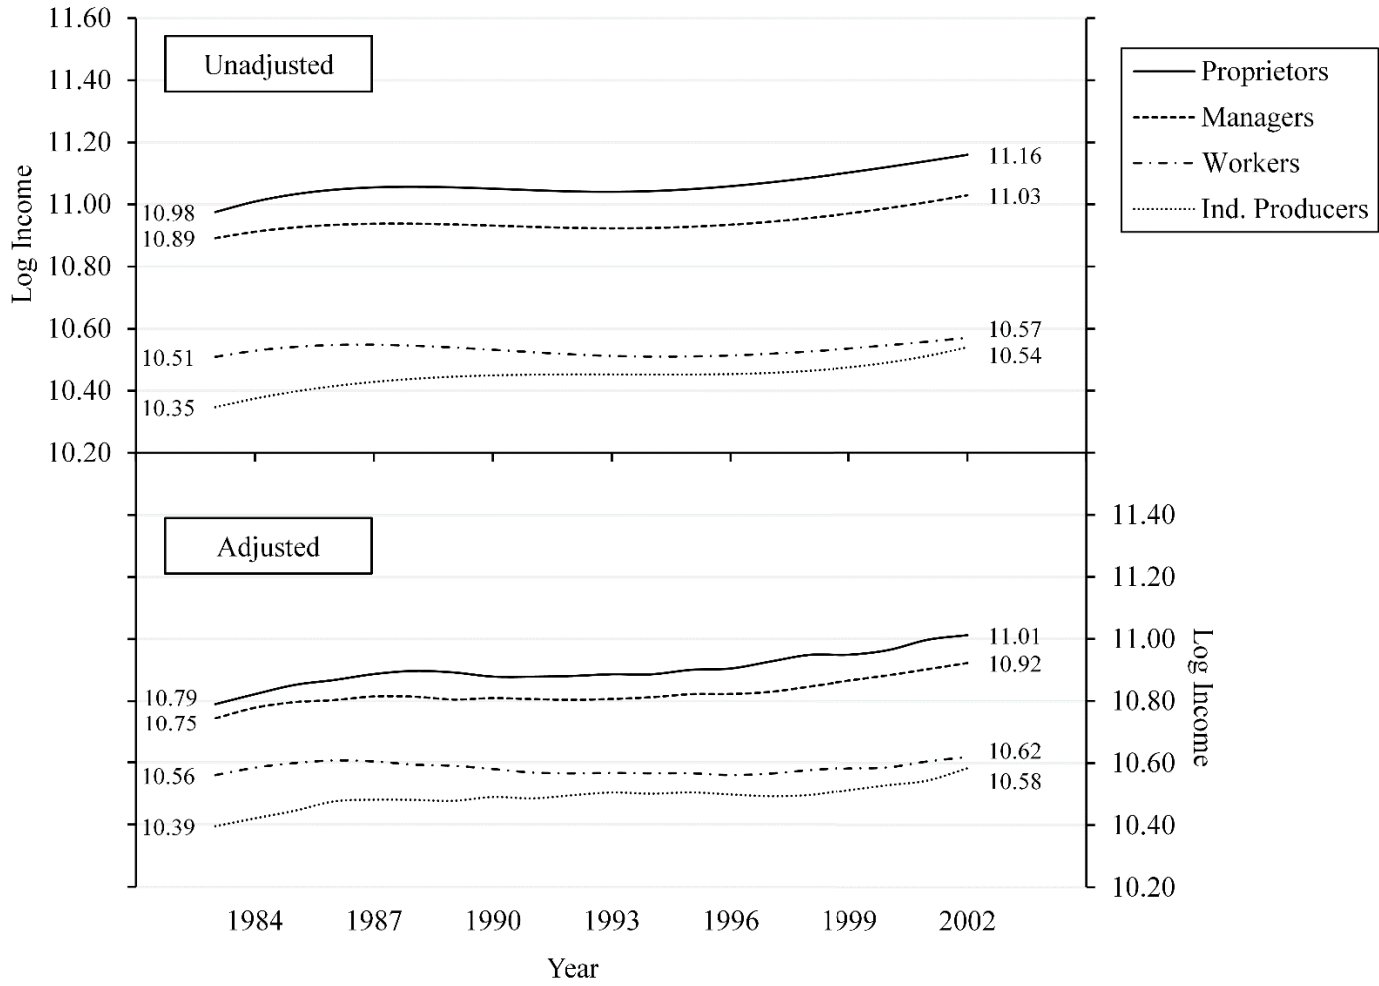

Notes: Sample includes respondents who are 18 to 65 years old and work full-time in the 1983 to 2002 CPS waves. Results are combined estimates from 10 multiple imputation datasets.

Figure A.2. Trends in Between-class Income Differences (Occupational Proxy Measure)

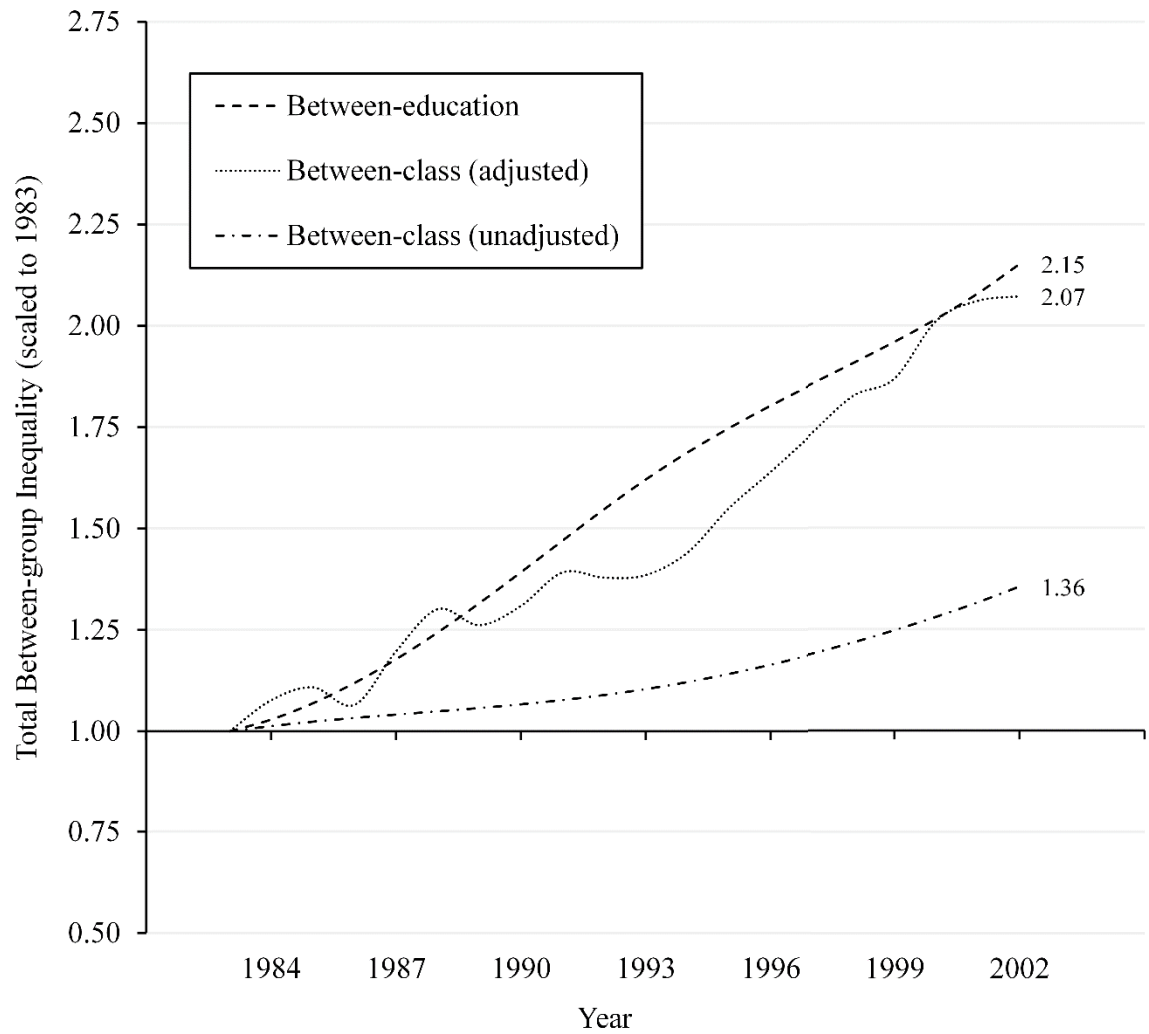

Notes: Sample includes respondents who are 18 to 65 years old and work full-time in the 1983 to 2002 CPS waves. Results are combined estimates from 10 multiple imputation datasets.

Figure A.3. Smoothed Trends in Total Income Inequality

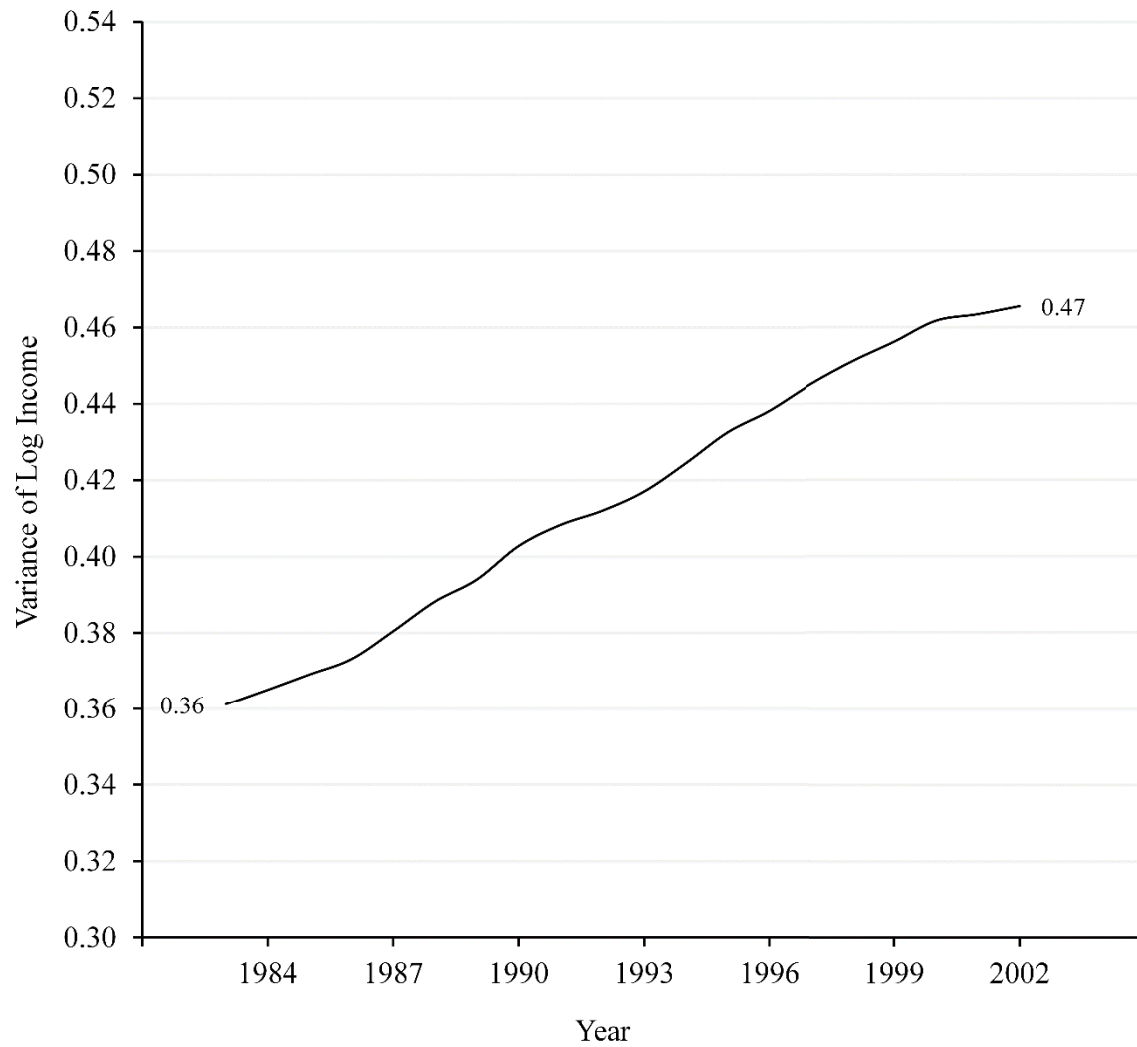

Notes: Sample includes respondents who are 18 to 65 years old and work full-time in the 1983 to 2002 CPS waves. Results are combined estimates from 10 multiple imputation datasets.

Figure A.4. Counterfactual Estimates of Total Income Inequality

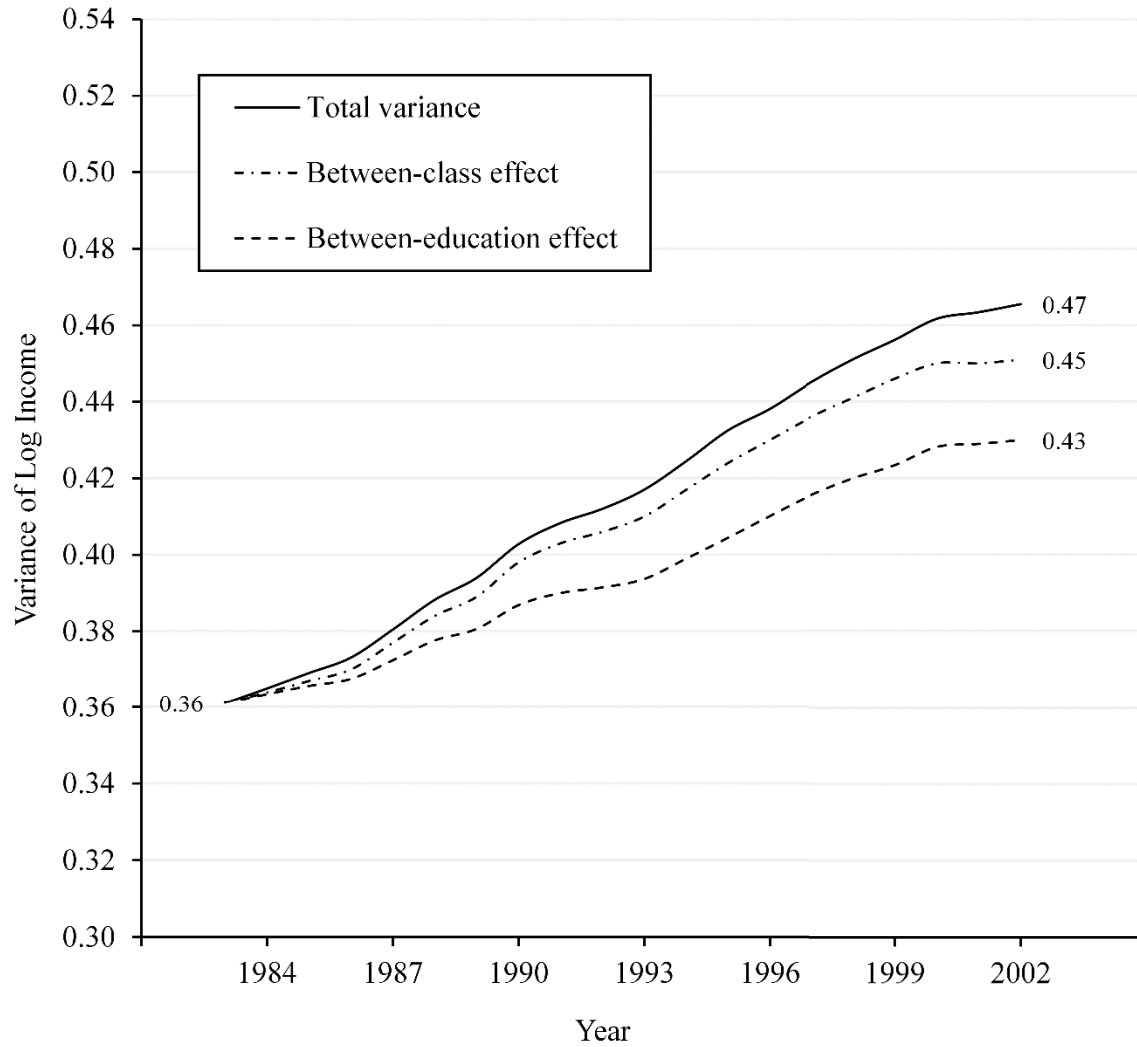

Notes: Sample includes respondents who are 18 to 65 years old and work full-time in the 1983 to 2002 CPS waves. Results are combined estimates from 10 multiple imputation datasets.

## Measurement of Occupational Classes in the GSS

Table B.1. Occupational Coding in the GSS

| Disaggregate Occupations |                            | Aggregate Occupations |               | 1970 SOC's                            |
|--------------------------|----------------------------|-----------------------|---------------|---------------------------------------|
| Code                     | Label                      | Code                  | Label         |                                       |
| 1                        | architects                 | 1                     | professionals | 2                                     |
| 2                        | engineers                  | 1                     | professionals | 6,10-15,20-23                         |
| 3                        | natural scientists         | 1                     | professionals | 34-36,42-45,51-54                     |
| 4                        | engineering/science techs  | 1                     | professionals | 150-156,161-162,172                   |
| 5                        | physicians and dentists    | 1                     | professionals | 62,65                                 |
| 6                        | other health professionals | 1                     | professionals | 61,63-64,71-74                        |
| 7                        | nurses and hygienists      | 1                     | professionals | 75,81,923                             |
| 8                        | therapists                 | 1                     | professionals | 76,84                                 |
| 9                        | health techs               | 1                     | professionals | 80,82-83,85                           |
| 10                       | social scientists          | 1                     | professionals | 91-94,96                              |
| 11                       | religious workers          | 1                     | professionals | 86,90                                 |
| 12                       | social workers             | 1                     | professionals | 100-101,174                           |
| 13                       | professors and instructors | 1                     | professionals | 102-105,110-116,120-126,130-135,140   |
| 14                       | primary/secondary teachers | 1                     | professionals | 141-145                               |
| 15                       | jurists                    | 1                     | professionals | 30-31                                 |
| 16                       | librarians and curators    | 1                     | professionals | 32-33                                 |
| 17                       | creative artists           | 1                     | professionals | 175,182,185,190,193-194               |
| 18                       | authors and journalists    | 1                     | professionals | 181,184                               |
| 19                       | designers and decorators   | 1                     | professionals | 183,425                               |
| 20                       | accountants                | 1                     | professionals | 1                                     |
| 21                       | computer specialists       | 1                     | professionals | 3-5                                   |
| 22                       | personnel workers          | 1                     | professionals | 56                                    |
| 23                       | public relations profs.    | 1                     | professionals | 192                                   |
| 24                       | applied research workers   | 1                     | professionals | 55,95,195                             |
| 25                       | professionals, n.e.c.      | 1                     | professionals | 24-26,163-164,170-171,173,180,191,363 |

Table B.1. Occupational Coding in the GSS Continued

| Disaggregate Occupations |                              | Aggregate Occupations |                      | 1970 SOC <sub>s</sub> |
|--------------------------|------------------------------|-----------------------|----------------------|-----------------------|
| Code                     | Label                        | Code                  | Label                |                       |
| 26                       | government officials         | 2                     | managers/admin.      | 201,213,215,222,224   |
| 27                       | financial managers           | 2                     | managers/admin.      | 202,210               |
| 28                       | buyers                       | 2                     | managers/admin.      | 203,205,225           |
| 29                       | sales managers               | 2                     | managers/admin.      | 231,233               |
| 30                       | office managers, n.e.c.      | 2                     | managers/admin.      | 220                   |
| 31                       | building managers            | 2                     | managers/admin.      | 216,940               |
| 32                       | restaurant managers          | 2                     | managers/admin.      | 230                   |
| 33                       | health administrators        | 2                     | managers/admin.      | 212                   |
| 34                       | school administrators        | 2                     | managers/admin.      | 235,240               |
| 35                       | managers, n.e.c.             | 2                     | managers/admin.      | 211,221,223,245       |
| 36                       | insurance agents             | 3                     | sales occupations    | 265                   |
| 37                       | real estate agents           | 3                     | sales occupations    | 270                   |
| 38                       | agents, n.e.c.               | 3                     | sales occupations    | 260,261,271           |
| 39                       | salespersons                 | 3                     | sales occupations    | 262,264,280-285       |
| 40                       | clerical supervisors         | 4                     | clerical occupations | 312                   |
| 41                       | estimators and investigators | 4                     | clerical occupations | 321                   |
| 42                       | insurance adjusters          | 4                     | clerical occupations | 326                   |
| 43                       | cashiers                     | 4                     | clerical occupations | 310                   |
| 44                       | bank tellers                 | 4                     | clerical occupations | 301                   |
| 45                       | counter clerks (not food)    | 4                     | clerical occupations | 314,390               |
| 46                       | secretaries                  | 4                     | clerical occupations | 364,370-372,376,391   |
| 47                       | accounting clerks            | 4                     | clerical occupations | 303,305,360           |
| 48                       | office machine operators     | 4                     | clerical occupations | 341-345,350,355       |
| 49                       | tabulation clerks            | 4                     | clerical occupations | 334,375               |
| 50                       | postal clerks                | 4                     | clerical occupations | 361                   |

Table B.1. Occupational Coding in the GSS Continued

| Disaggregate Occupations |                             | Aggregate Occupations |                      | 1970 SOC <sub>s</sub>                               |
|--------------------------|-----------------------------|-----------------------|----------------------|-----------------------------------------------------|
| Code                     | Label                       | Code                  | Label                |                                                     |
| 51                       | mail carriers               | 4                     | clerical occupations | 331                                                 |
| 52                       | mail distribution clerks    | 4                     | clerical occupations | 332,333,383                                         |
| 53                       | telephone operators         | 4                     | clerical occupations | 384-385                                             |
| 54                       | expeditors                  | 4                     | clerical occupations | 323                                                 |
| 55                       | stock clerks/storekeepers   | 4                     | clerical occupations | 381                                                 |
| 56                       | warehouse clerks            | 4                     | clerical occupations | 374,392                                             |
| 57                       | teacher aides               | 4                     | clerical occupations | 382,952                                             |
| 58                       | clerks, n.e.c.              | 4                     | clerical occupations | 165,311,313,315,320,325,330,362,394-395,505,931,954 |
| 59                       | supervisors of manual labor | 5                     | craft occupations    | 441,821                                             |
| 60                       | inspectors                  | 5                     | craft occupations    | 452                                                 |
| 61                       | metal processors            | 5                     | craft occupations    | 403,442,446,503-504,533,622,626                     |
| 62                       | machinists                  | 5                     | craft occupations    | 454,461-462,502,561-562                             |
| 63                       | structural metal workers    | 5                     | craft occupations    | 404,535-536,540,550                                 |
| 64                       | stationary engine operators | 5                     | craft occupations    | 525,545,666                                         |
| 65                       | heavy machinery operators   | 5                     | craft occupations    | 412,424,436                                         |
| 66                       | power/phone line workers    | 5                     | craft occupations    | 433,554                                             |
| 67                       | rail conductors/engineers   | 5                     | craft occupations    | 226,455-456                                         |
| 68                       | printers                    | 5                     | craft occupations    | 405,422-423,434,515,530-531                         |
| 69                       | tailors                     | 5                     | craft occupations    | 444,542,551,613,636                                 |
| 70                       | bakers                      | 5                     | craft occupations    | 402                                                 |
| 71                       | HVAC mechanics              | 5                     | craft occupations    | 470                                                 |
| 72                       | aircraft mechanics          | 5                     | craft occupations    | 471                                                 |
| 73                       | automobile mechanics        | 5                     | craft occupations    | 401,472-474                                         |
| 74                       | small electronics mechanics | 5                     | craft occupations    | 475,484-485                                         |
| 75                       | heavy equipment mechanics   | 5                     | craft occupations    | 480-481,486                                         |



Table B.1. Occupational Coding in the GSS Continued

| Disaggregate Occupations |                              | Aggregate Occupations |                   | 1970 SOC <sub>s</sub>                                   |
|--------------------------|------------------------------|-----------------------|-------------------|---------------------------------------------------------|
| Code                     | Label                        | Code                  | Label             |                                                         |
| 76                       | mechanics, n.e.c.            | 5                     | craft occupations | 482-483,491-492,495,552                                 |
| 77                       | electricians                 | 5                     | craft occupations | 430-431                                                 |
| 78                       | brickmasons                  | 5                     | craft occupations | 410-411                                                 |
| 79                       | carpenters                   | 5                     | craft occupations | 415-416                                                 |
| 80                       | painters                     | 5                     | craft occupations | 510-511                                                 |
| 81                       | plumbers                     | 5                     | craft occupations | 522-523                                                 |
| 82                       | construction crafts, n.e.c.  | 5                     | craft occupations | 413,420-421,440,445,512,520-521,534,560,601,615         |
| 83                       | craft occupations, n.e.c.    | 5                     | craft occupations | 426,435,443,450,453,506,514,516,543,546,563,571-572,575 |
| 84                       | graders and sorters          | 6                     | operatives        | 625                                                     |
| 85                       | launderers                   | 6                     | operatives        | 611,630                                                 |
| 86                       | sewers                       | 6                     | operatives        | 663                                                     |
| 87                       | textile operatives           | 6                     | operatives        | 620,670-674                                             |
| 88                       | precision machine operative  | 6                     | operatives        | 650,652-653                                             |
| 89                       | finishing machine operatives | 6                     | operatives        | 621,635,651                                             |
| 90                       | assemblers                   | 6                     | operatives        | 602                                                     |
| 91                       | welders                      | 6                     | operatives        | 680                                                     |
| 92                       | meat cutters                 | 6                     | operatives        | 631,633-634                                             |
| 93                       | packagers                    | 6                     | operatives        | 604,643                                                 |
| 94                       | machine operatives, n.e.c.   | 6                     | operatives        | 501,612,641,644-645,656,660,664-665,681,690,692         |
| 95                       | miners                       | 6                     | operatives        | 614,640                                                 |
| 96                       | lumbermen and sawyers        | 6                     | operatives        | 662,761                                                 |
| 97                       | fork lift operatives         | 6                     | operatives        | 706                                                     |
| 98                       | home delivery occupations    | 6                     | operatives        | 266,705                                                 |
| 99                       | mass transit drivers         | 6                     | operatives        | 703-704                                                 |
| 100                      | taxicab drivers              | 6                     | operatives        | 714                                                     |

Table B.1. Occupational Coding in the GSS Continued

| Disaggregate Occupations |                            | Aggregate Occupations |                     | 1970 SOC <sub>s</sub>           |
|--------------------------|----------------------------|-----------------------|---------------------|---------------------------------|
| Code                     | Label                      | Code                  | Label               |                                 |
| 101                      | truck drivers              | 6                     | operatives          | 715                             |
| 102                      | garage occupations         | 6                     | operatives          | 623                             |
| 103                      | operatives, n.e.c.         | 6                     | operatives          | 605,642,661,694-695,701,710-713 |
| 104                      | freight handlers           | 7                     | general laborers    | 753,760,770                     |
| 105                      | retail stock handlers      | 7                     | general laborers    | 762                             |
| 106                      | construction laborers      | 7                     | general laborers    | 750-751                         |
| 107                      | gardeners                  | 7                     | general laborers    | 755                             |
| 108                      | laborers, n.e.c.           | 7                     | general laborers    | 740,754,763-764,780,785         |
| 109                      | cleaners                   | 8                     | service occupations | 901-903                         |
| 110                      | bartenders                 | 8                     | service occupations | 910                             |
| 111                      | wait staff                 | 8                     | service occupations | 911,915                         |
| 112                      | cooks                      | 8                     | service occupations | 912                             |
| 113                      | kitchen helpers            | 8                     | service occupations | 913,916                         |
| 114                      | practical nurses           | 8                     | service occupations | 921,924,926                     |
| 115                      | health aides               | 8                     | service occupations | 922,925                         |
| 116                      | childcare occupations      | 8                     | service occupations | 942                             |
| 117                      | hair stylists              | 8                     | service occupations | 935,944-945                     |
| 118                      | attendants, n.e.c.         | 8                     | service occupations | 932-934,941,943,953,960         |
| 119                      | law enforcement officers   | 8                     | service occupations | 963-965                         |
| 120                      | guards                     | 8                     | service occupations | 962                             |
| 121                      | firefighters               | 8                     | service occupations | 961                             |
| 122                      | housekeepers (not private) | 8                     | service occupations | 950                             |
| 123                      | food counter workers       | 8                     | service occupations | 914                             |
| 124                      | private household workers  | 8                     | service occupations | 980-984                         |
| 125                      | farmers                    | 9                     | agr. occupations    | 801-802,823                     |
| 126                      | farm laborers              | 9                     | agr. occupations    | 752,822,824                     |
| 127                      | military personnel         | 8                     | service occupations | 580,590                         |
